# Supplementary material
Source: publisher figshare collection journal article supplement (https://gsajournals.figshare.com/ndownloader/files/15078335)
Supplement: Supplementary file 1 [file 15078335]

## Sheet: Biological Process
ID	Name	Bgd count	Result count	Result gene list	Pct of bgd	Fold enrichment	Odds ratio	P-value	Benjamini	Bonferroni
GO:0042493	response to drug	77	3	CNAG_00375,CNAG_02236,CNAG_07636,	3.9	17.08	26.1	0.000551615	0.0127603	0.0490937
GO:0031000	response to caffeine	20	2	CNAG_02236,CNAG_07636,	10	43.84	62.21	0.000860248	0.0127603	0.0765621
GO:0036270	response to diuretic	20	2	CNAG_02236,CNAG_07636,	10	43.84	62.21	0.000860248	0.0127603	0.0765621
GO:0009410	response to xenobiotic stimulus	20	2	CNAG_02236,CNAG_07636,	10	43.84	62.21	0.000860248	0.0127603	0.0765621
GO:0043279	response to alkaloid	20	2	CNAG_02236,CNAG_07636,	10	43.84	62.21	0.000860248	0.0127603	0.0765621
GO:0014074	response to purine-containing compound	20	2	CNAG_02236,CNAG_07636,	10	43.84	62.21	0.000860248	0.0127603	0.0765621
GO:0045229	external encapsulating structure organization	104	3	CNAG_00375,CNAG_02236,CNAG_07636,	2.9	12.65	18.99	0.00133108	0.0134665	0.118466
GO:0071852	fungal-type cell wall organization or biogenesis	29	2	CNAG_02236,CNAG_07636,	6.9	30.24	41.38	0.00181871	0.0134665	0.161865
GO:0031505	fungal-type cell wall organization	29	2	CNAG_02236,CNAG_07636,	6.9	30.24	41.38	0.00181871	0.0134665	0.161865
GO:0071555	cell wall organization	30	2	CNAG_02236,CNAG_07636,	6.7	29.23	39.89	0.00194631	0.0134665	0.173222
GO:0014070	response to organic cyclic compound	30	2	CNAG_02236,CNAG_07636,	6.7	29.23	39.89	0.00194631	0.0134665	0.173222
GO:0071554	cell wall organization or biogenesis	30	2	CNAG_02236,CNAG_07636,	6.7	29.23	39.89	0.00194631	0.0134665	0.173222
GO:0042221	response to chemical	119	3	CNAG_00375,CNAG_02236,CNAG_07636,	2.5	11.05	16.47	0.00196702	0.0134665	0.175064
GO:0010243	response to organonitrogen compound	33	2	CNAG_02236,CNAG_07636,	6.1	26.57	36	0.00235404	0.0149649	0.209509
GO:0050896	response to stimulus	295	4	CNAG_00375,CNAG_02236,CNAG_02682,CNAG_07636,	1.4	5.95	10.02	0.00285303	0.016928	0.25392
GO:1902074	response to salt	45	2	CNAG_02236,CNAG_07636,	4.4	19.49	25.87	0.00435146	0.0212844	0.38728
GO:0072706	response to sodium dodecyl sulfate	45	2	CNAG_02236,CNAG_07636,	4.4	19.49	25.87	0.00435146	0.0212844	0.38728
GO:0010033	response to organic substance	46	2	CNAG_02236,CNAG_07636,	4.3	19.06	25.28	0.00454386	0.0212844	0.404404
GO:1901698	response to nitrogen compound	46	2	CNAG_02236,CNAG_07636,	4.3	19.06	25.28	0.00454386	0.0212844	0.404404
GO:0016043	cellular component organization	202	3	CNAG_00375,CNAG_02236,CNAG_07636,	1.5	6.51	9.39	0.00882666	0.0392787	0.785573
GO:0033037	polysaccharide localization	5	1	CNAG_07636,	20	87.69	122.91	0.0113578	0.0421184	1
GO:0006801	superoxide metabolic process	5	1	CNAG_02292,	20	87.69	122.91	0.0113578	0.0421184	1
GO:0006033	chitin localization	5	1	CNAG_07636,	20	87.69	122.91	0.0113578	0.0421184	1
GO:0072593	reactive oxygen species metabolic process	5	1	CNAG_02292,	20	87.69	122.91	0.0113578	0.0421184	1
GO:0071840	cellular component organization or biogenesis	227	3	CNAG_00375,CNAG_02236,CNAG_07636,	1.3	5.79	8.29	0.0121846	0.0433771	1
GO:1901327	response to tacrolimus	6	1	CNAG_00375,	16.7	73.07	98.3	0.0136155	0.046607	1
GO:0045230	capsule organization	90	2	CNAG_00375,CNAG_02236,	2.2	9.74	12.5	0.0166881	0.0550088	1
GO:0006298	mismatch repair	9	1	CNAG_02682,	11.1	48.72	61.39	0.0203613	0.0647198	1
GO:0009408	response to heat	14	1	CNAG_07636,	7.1	31.32	37.73	0.0315132	0.093489	1
GO:0009266	response to temperature stimulus	14	1	CNAG_07636,	7.1	31.32	37.73	0.0315132	0.093489	1
GO:0006950	response to stress	146	2	CNAG_02682,CNAG_07636,	1.4	6.01	7.53	0.0412648	0.11847	1
